# Supplementary material
Source: Springer Nature journal article supplement (https://www.springermedizin.de/resource/supplementary/12967_2010_536_MOESM4_ESM.pdf/9576460)

# Pegfilgrastim

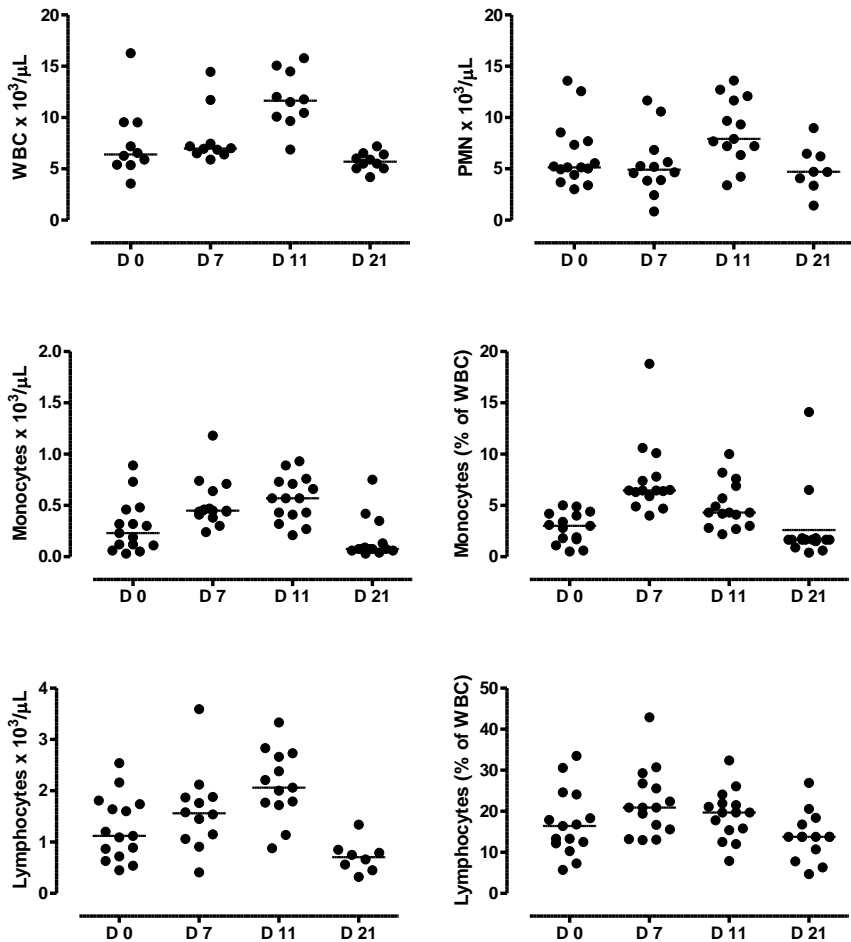

# Filgrastim

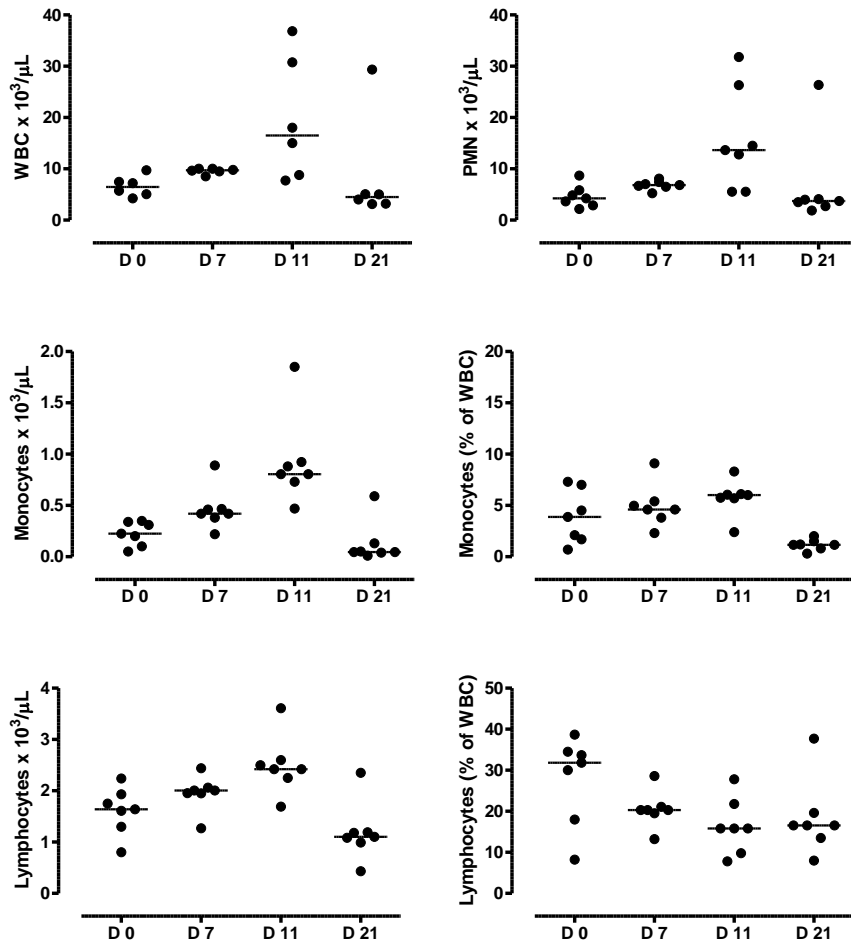

Supplement: MOESM4 [file 9576460]
